# Supplementary material for: Neuroprotective effect of aloe emodin against Huntington's disease-like symptoms in R6/1 transgenic mice
Source: Royal Society of Chemistry journal article supplement (doi:10.1039/d3fo00156c), 2023-01-01
Supplement: d3fo00156c1.zip [file d3fo00156c1.zip]

## Blots presented in Fig.4a

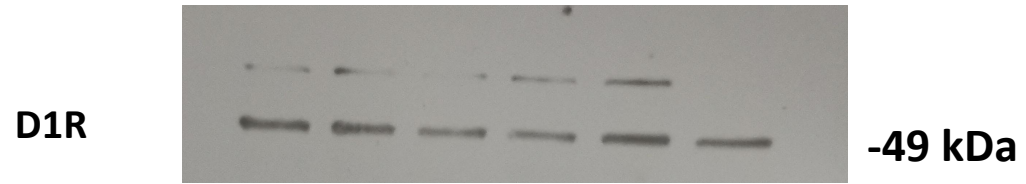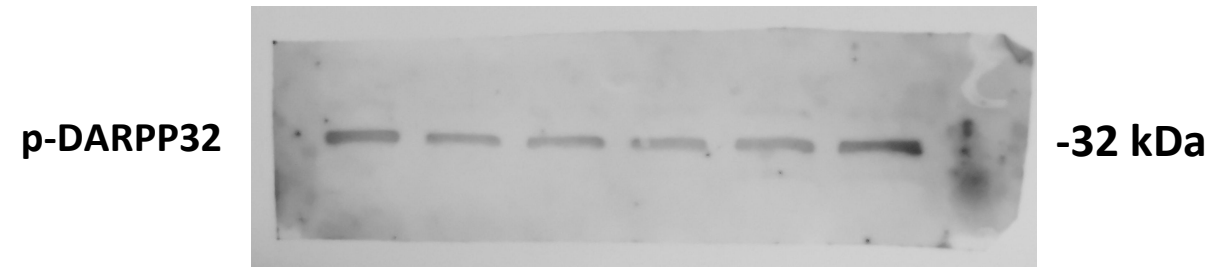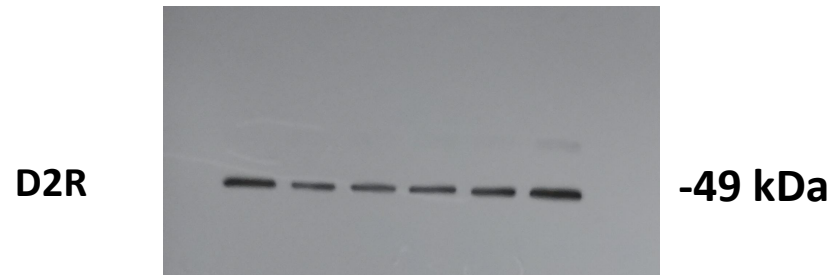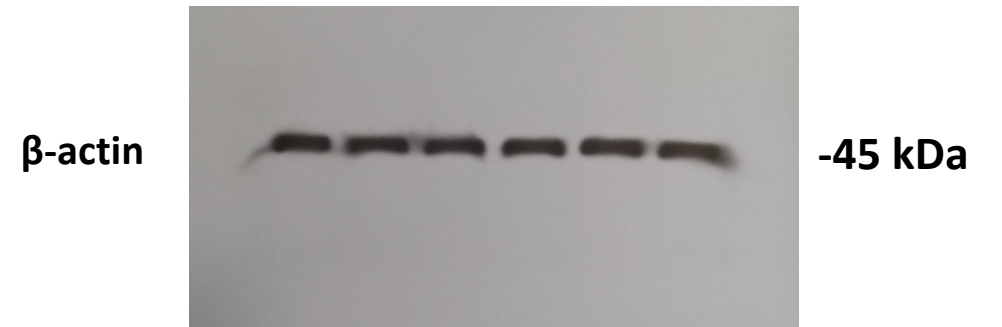

The lane of the gels from left to right represents Control 1, Control 2, Model 1, Model 2, Aloe emodin 1, Aloe emodin 2.

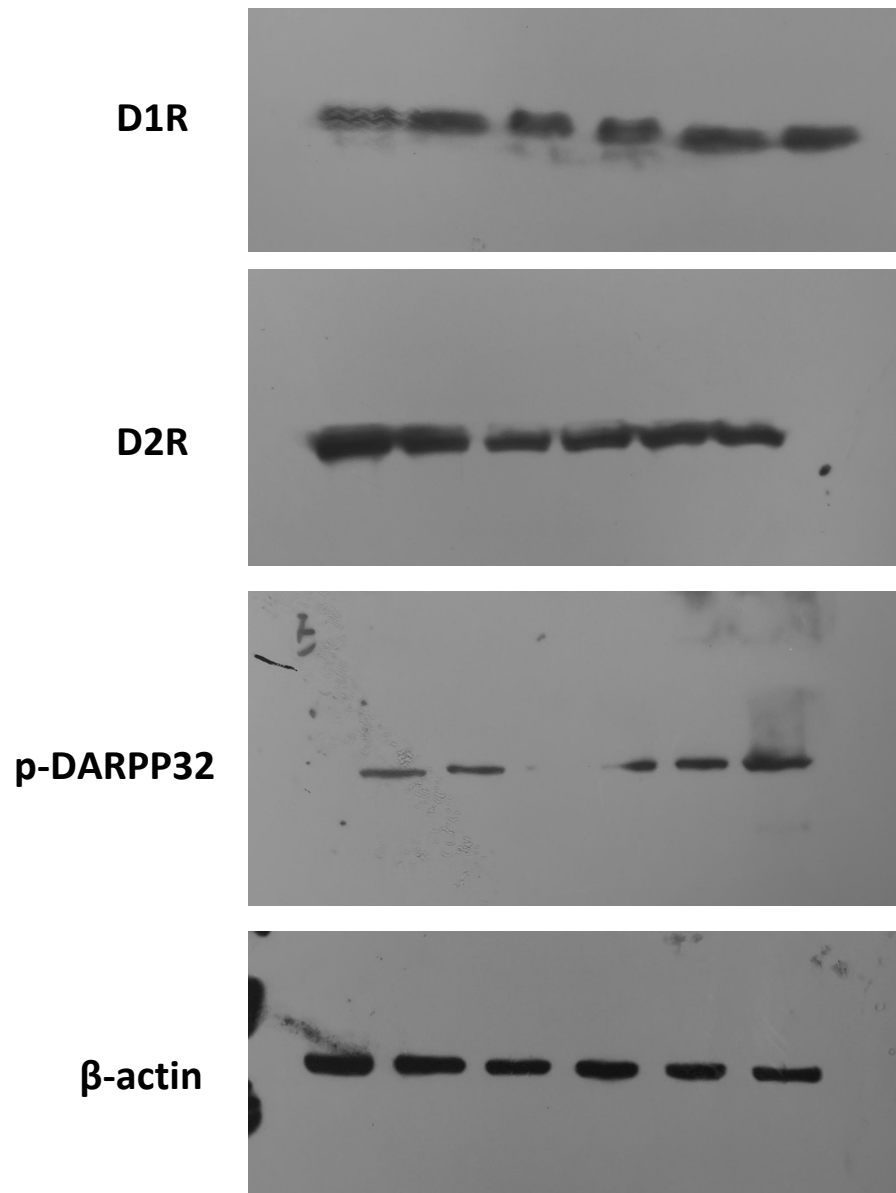

The lane of the gels from left to right represents Control 3, Control 4, Model 3, Model 4, Aloe emodin 3, Aloe emodin 4.

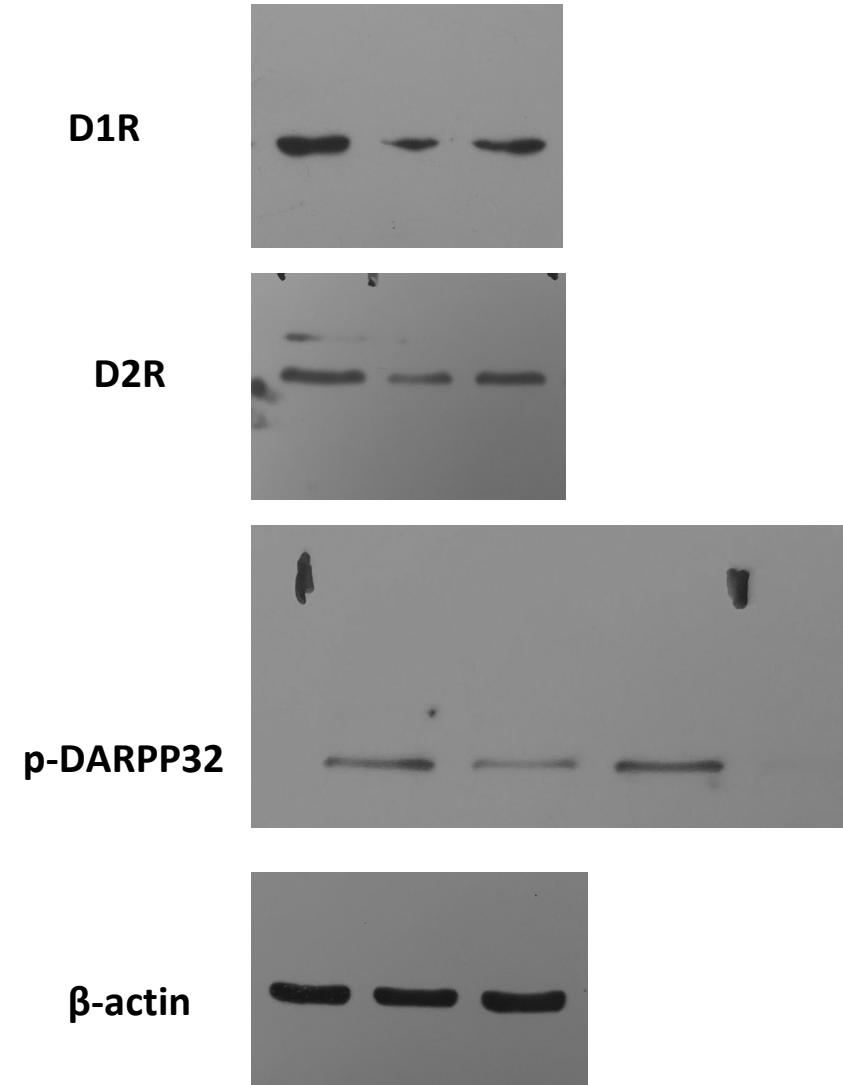

The lane of the gels from left to right represents Control 5, Model 5, Aloe emodin 5.

## Blots presented in Fig.5a

mHtt

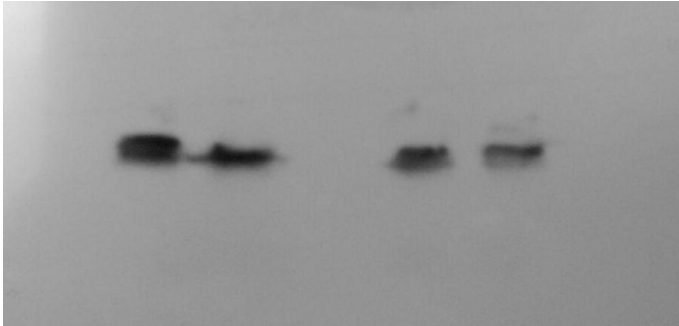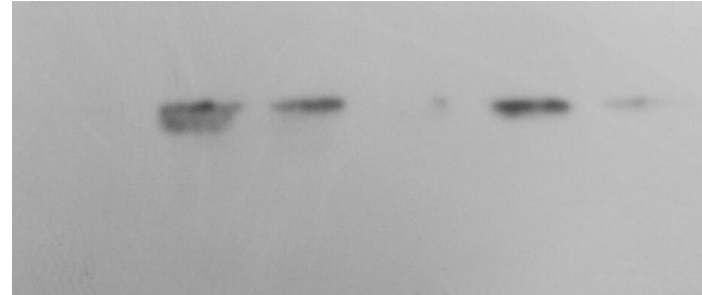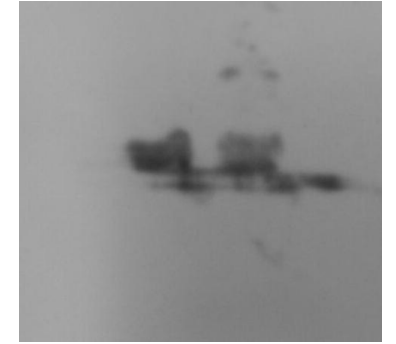

$\beta$ -actin

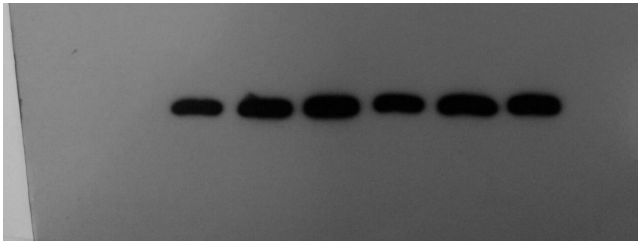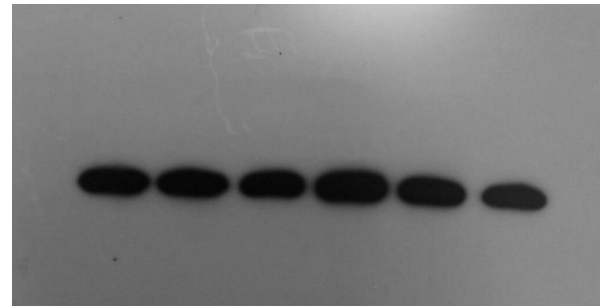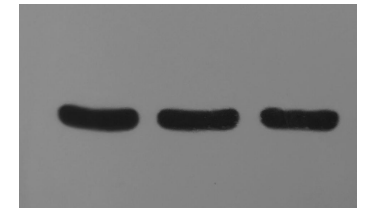

The lane of the gels from left to right represents Control 1, Model 1, Aloe emodin 1, Control 2, Model 2, Aloe emodin 2, Control 3, Model 3, Aloe emodin 3, Control 4, Model 4, Aloe emodin 4, Control 5, Model 5, Aloe emodin5 .

## Blots presented in Fig.6d

p-CaMK II

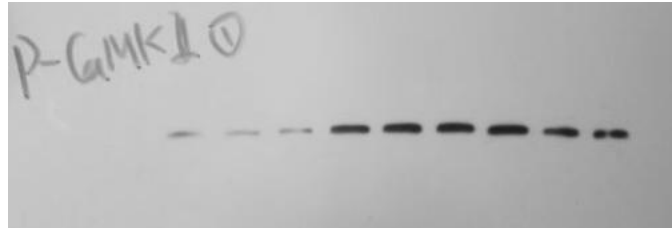

-50 kDa

p-Samd2/3

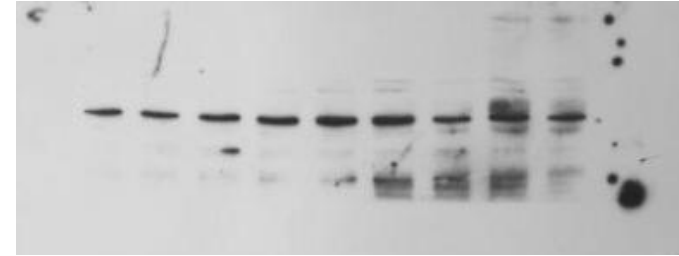

-50 kDa

CaMKII

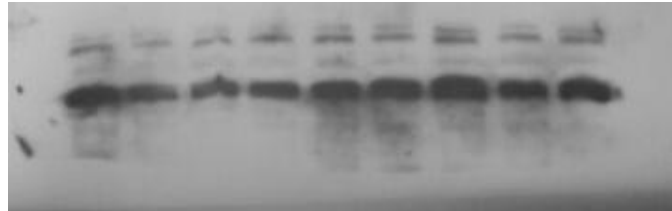

-50 kDa

Samd2/3

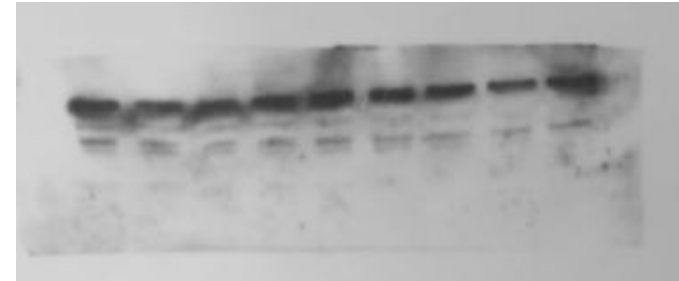

-50 kDa

The lane of the gels from left to right represents Control 1, Control 2, Control 3, Model 1, Model 2, Model 3, Aloe emodin 1, Aloe emodin 2, Aloe emodin 3.

p-CaMK II

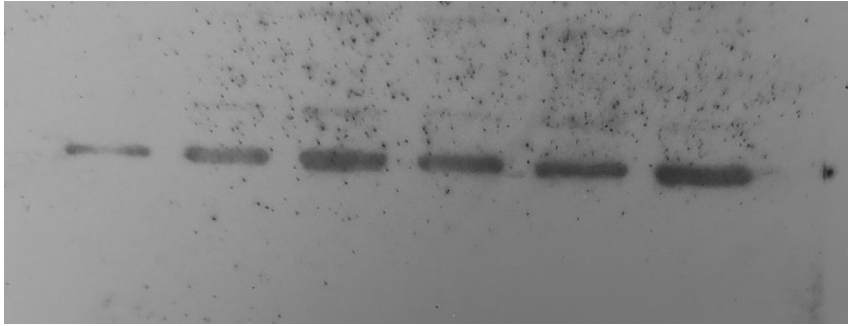

p-Samd2/3

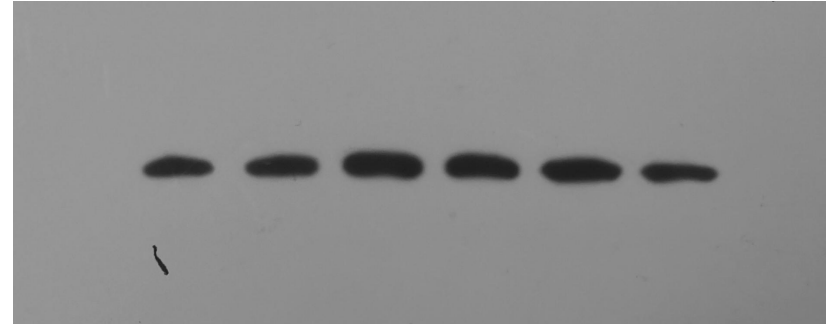

CaMKII

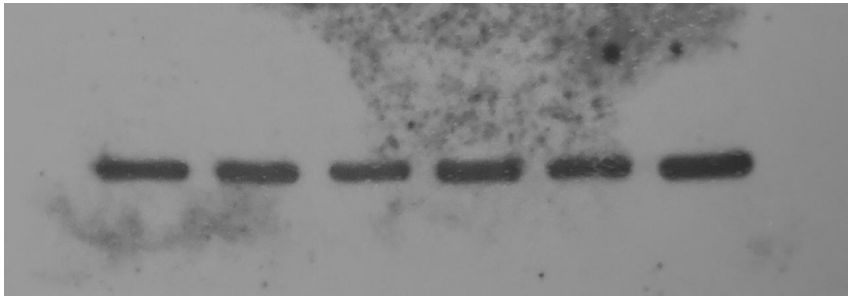

Samd2/3

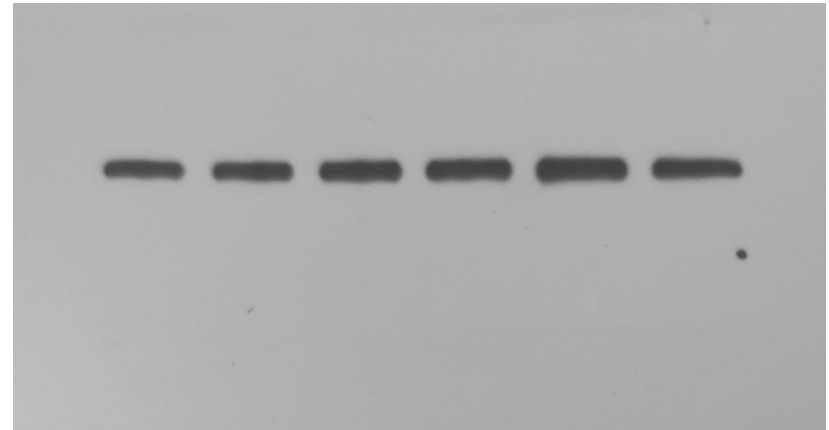

**The lane of the gels from left to right represents Control 4, Control 5, Model 4, Model 5, Aloe emodin 4, Aloe emodin 5.**

## Blots presented in Fig.7e

Bcl-2

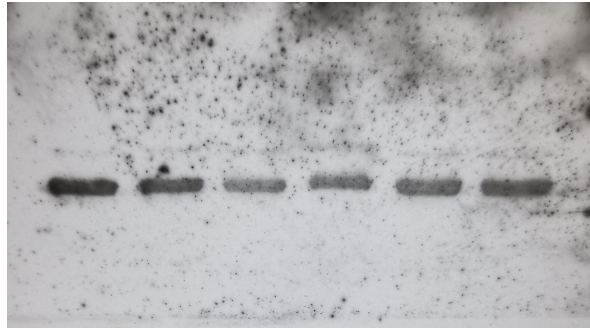

-25 KDa

Bax

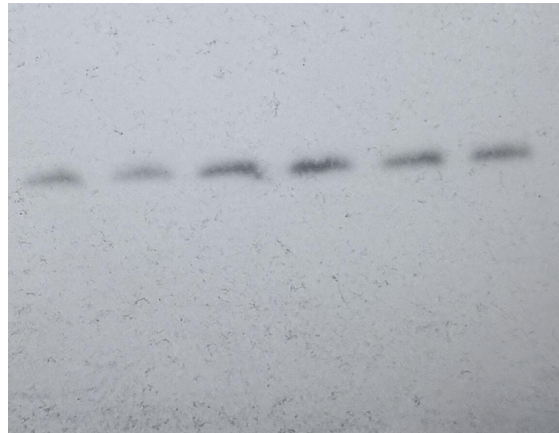

-21 KDa

$\beta$ -actin

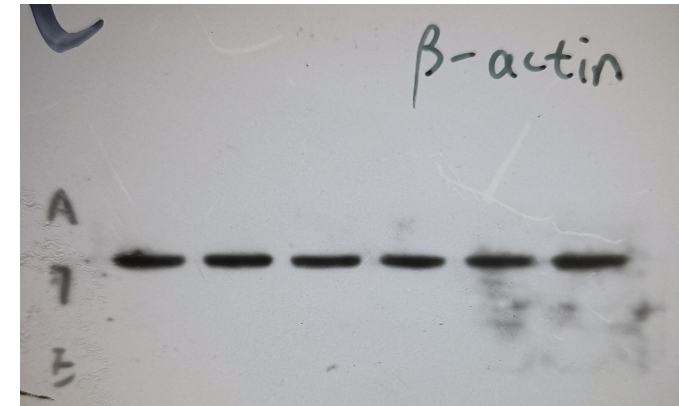

-45 kDa

The lane of the gels from left to right represents Control 1, Control 2, Model 1, Model 2, Aloe emodin 1, Aloe emodin 2.

$\beta$ -actin

Bcl-2

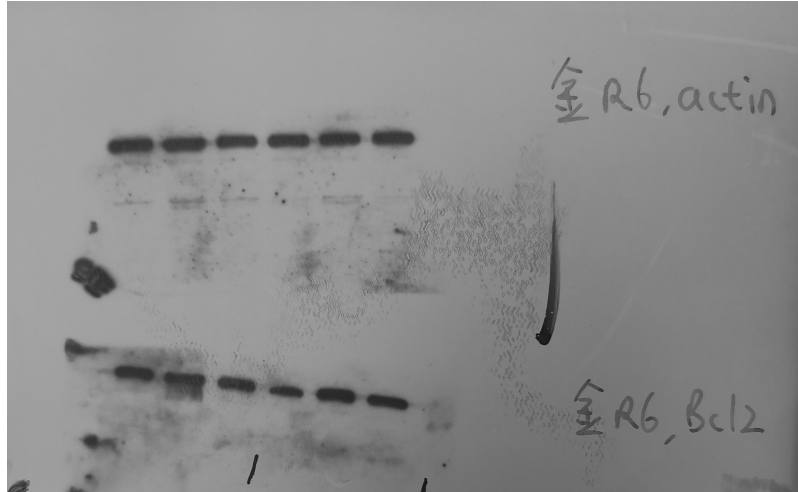

Bax

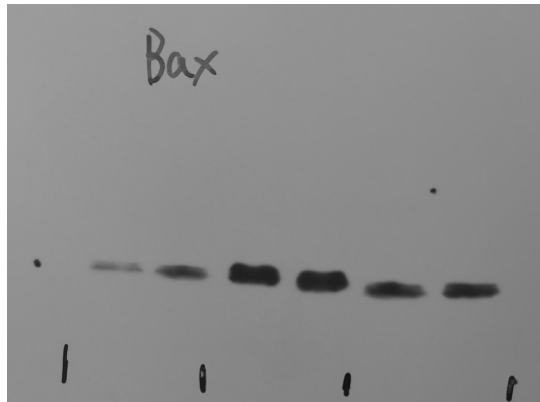

The lane of the gels from left to right represents Control 3, Control 4, Model 3, Model 4, Aloe emodin 3, Aloe emodin 4.

Bcl-2

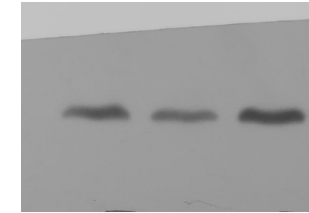

Bax

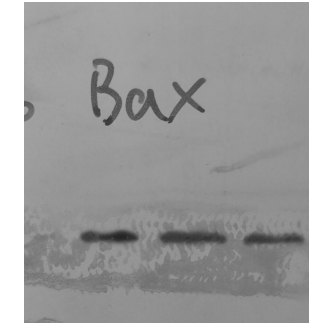

$\beta$ -actin

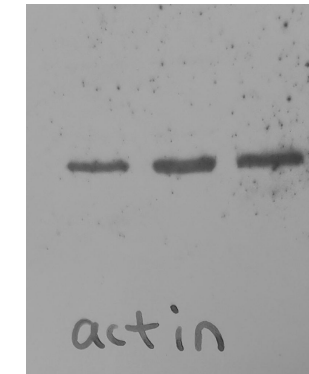

The lane of the gels from left to right represents Control 5, Model 5, Aloe emodin 5.
